# Supplementary material
Source: publisher figshare collection journal article supplement (https://tandf.figshare.com/articles/dataset/_/2868445)
Supplement: Supplementary file 1 [file 1]

Archive with 3 entries (3 files):
- tsfs_a_1092345_sm4310.pdf
- tsfs_a_1092345_sm4296.pdf
- tsfs_a_1092345_sm4259.pdf
