# Supplementary material
Source: publisher figshare collection journal article supplement (https://tandf.figshare.com/articles/dataset/_/2868445)
Supplement: Supplementary file 1 [file 1 › tsfs_a_1092345_sm4259.pdf]

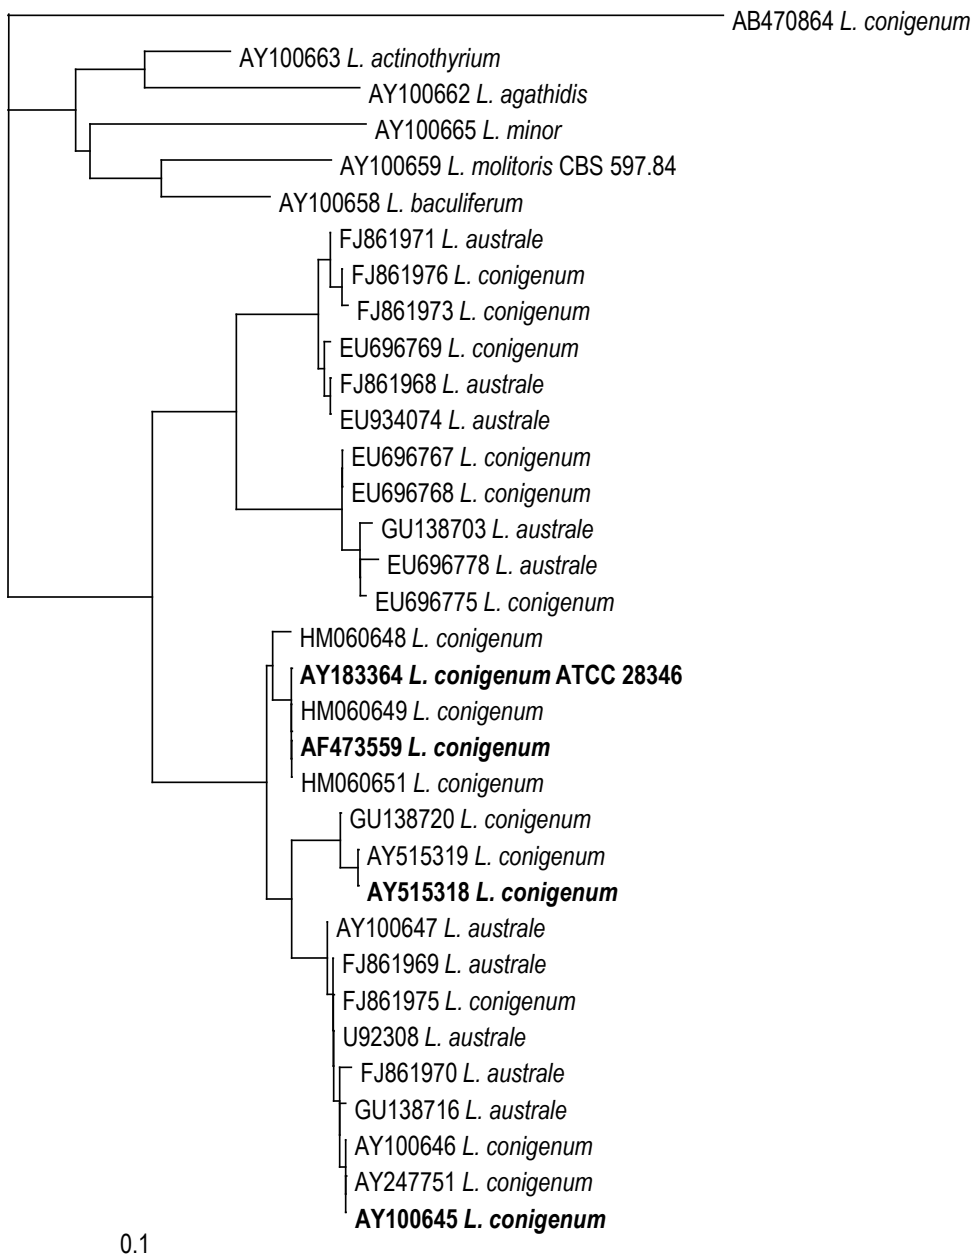

Supplementary Figure 1: Phylogenetic analysis of all available *Lophodermium conigenum* and *L. australe* sequences available in INSIDs. In the absence of a sequence from type material, ATCC 28346 is considered as a reference sequence for *L. conigenum*. Accessions in bold were used in further analyses (Figure 5).

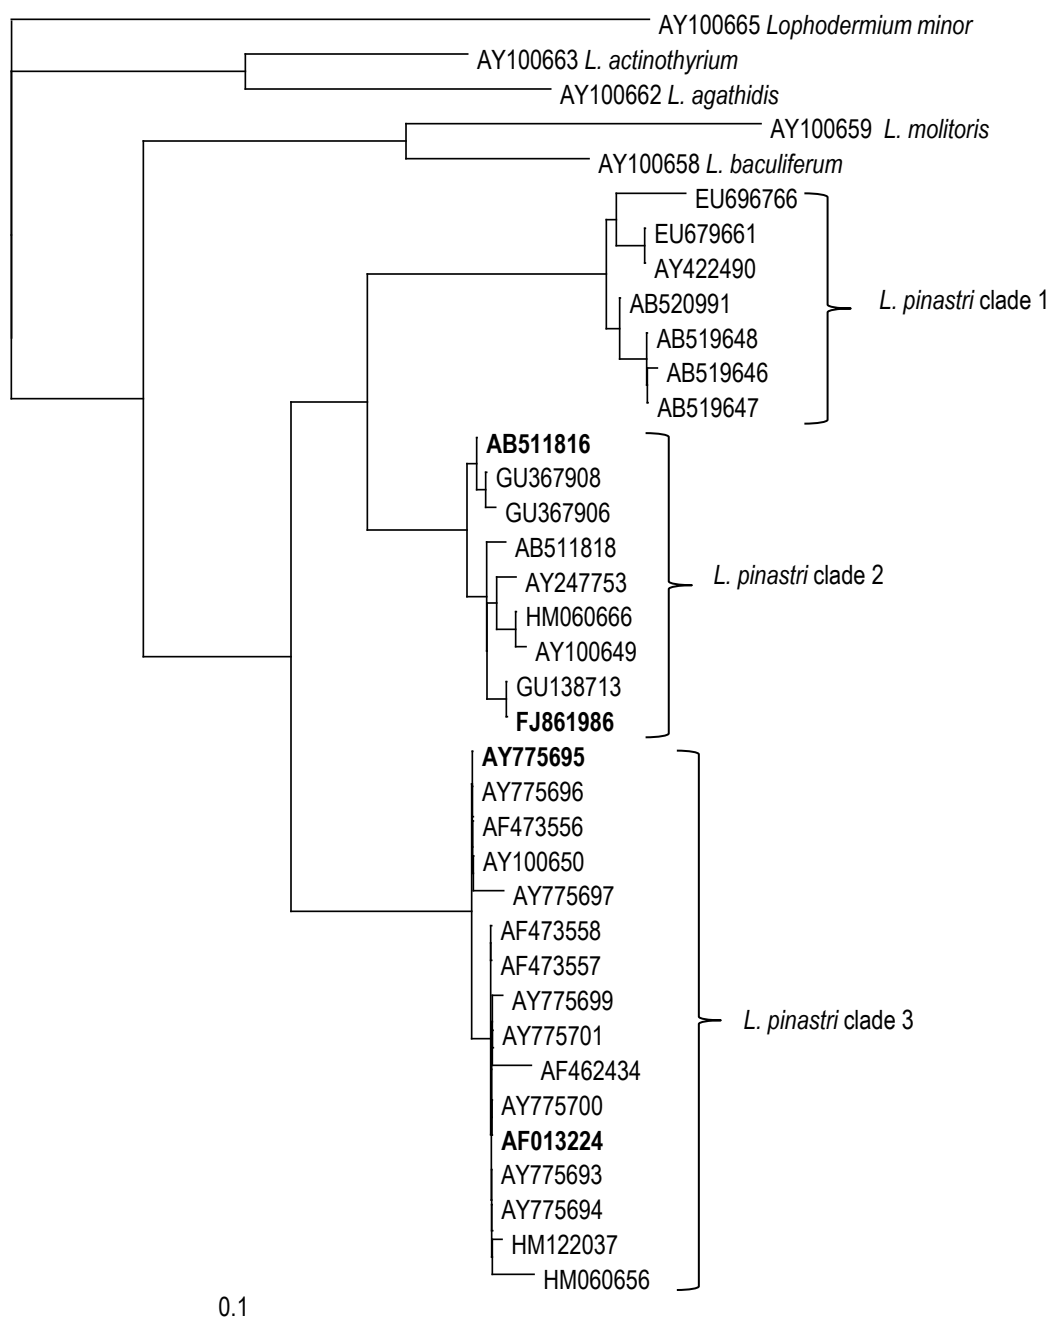

Supplementary Figure 2. Maximum likelihood analysis of all available *Lophodermium pinastri* ITS sequences from the INSDs. AF013224 is from an ex-type isolate, ATCC 28347, and is therefore considered as a reference sequence for *L. pinastri*. Accessions in bold were used in further analyses (Figure 6).
