# Supplementary material
Source: publisher figshare collection journal article supplement (https://tandf.figshare.com/articles/dataset/_/2868445)
Supplement: Supplementary file 1 [file 1 › tsfs_a_1092345_sm4296.pdf]

Table S1. Grouping of the most common cultures according to macroscopic morphological characters (Stalpers, 1978). Growth rates were estimated by measuring colony diameter at 1 month old: a diameter < 2 cm was considered as slow growth, 2-4 cm was considered as medium growth, and fast growth was demonstrated by a colony diameter > 4 cm . The criteria for OTU identifications are provided in Table 2 and Figures 1 – 7.

| Group | Gross morphology                                                                  | No. of sequenced isolates | OTU identification                  |                                                                                       |
|-------|-----------------------------------------------------------------------------------|---------------------------|-------------------------------------|---------------------------------------------------------------------------------------|
| 1     | Orange mycelium, zonate texture, irregular margin and slow to medium growth rate. | 77                        | <i>Coniochaeta</i> spp<br>(2 MOTUs) | 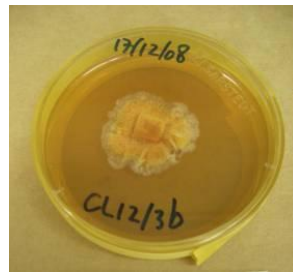   |
| 2     | White mycelium, felt texture, circular and medium growth rate.                    | 9                         | <i>Fimetariella rabenhorstii</i>    | 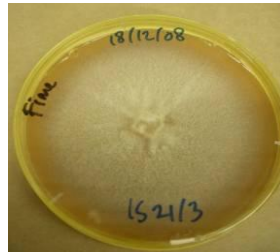  |
| 3     | White mycelium, silky texture, circular and fast growth rate.                     | 43                        | <i>Lophodermium pinastri</i>        | 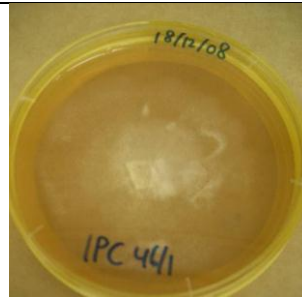 |

| Group | Gross morphology                                                                                           | No. of sequenced isolates | OTU identification                                                                                                       |                                                                                       |
|-------|------------------------------------------------------------------------------------------------------------|---------------------------|--------------------------------------------------------------------------------------------------------------------------|---------------------------------------------------------------------------------------|
| 4     | White or yellowish mycelium, irregular margin, white or black crustose and slow growth rate                | 35                        | <i>L. pinastri</i>                                                                                                       | 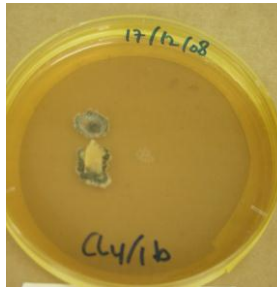   |
| 5     | White mycelium, finely floccose texture, slightly irregular margin and fast growing.                       | 12                        | <i>L. aff. conigenum</i>                                                                                                 | 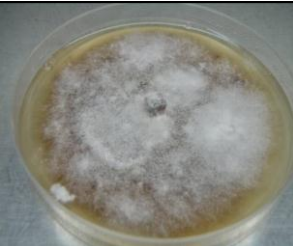   |
| 6     | White mycelium, brown reverse, thick woolly texture, irregular margin, medium growth rate.                 | 9                         | <i>L. aff. conigenum</i>                                                                                                 | 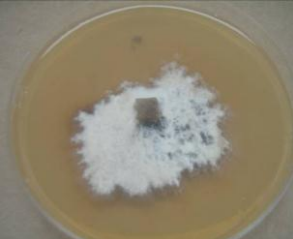  |
| 7     | White mycelium, silky texture, circular with radial streaks of more cottony mycelium and fast growth rate. | 31                        | <i>Xylaria castorea</i><br>Xylariaceae sp. 1<br>Xylariaceae sp. 2<br>Xylariaceae sp. 3<br>Xylariaceae sp. 4<br>(5 MOTUs) | 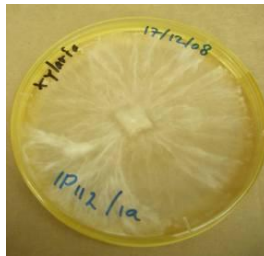 |

| Group | Gross morphology                                                                                                                                | No. of sequenced isolates | OTU identification                                                                           |                                                                                       |
|-------|-------------------------------------------------------------------------------------------------------------------------------------------------|---------------------------|----------------------------------------------------------------------------------------------|---------------------------------------------------------------------------------------|
| 8     | White mycelium brown reverse, thick silky texture, farinaceous patches, circular and medium to fast growth rate                                 | 17                        | <i>Anthostomella pinea</i><br><i>Nemania diffusa</i><br><i>Rosellinia</i> sp. 1<br>(3 MOTUs) | 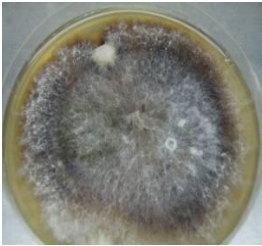   |
| 9     | White or pinkish mycelium, thick silky texture with pink tinge, crustose central patches, irregular margin and medium growth rate.              | 3                         | <i>C. minus</i> 'verum'                                                                      | 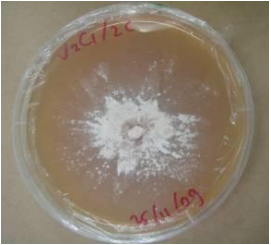   |
| 10    | White mycelium with brown reverse, velvety texture, some with white crustose central patches, irregular margins and slow to medium growth rate. | 2                         | <i>C. minus</i> 'simile'                                                                     | 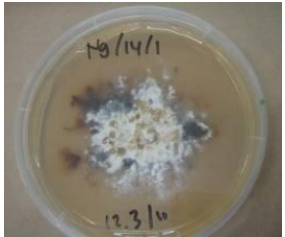  |
| 11    | White mycelium with brown reverse, felty surface, irregular margins and medium growth rate                                                      | 2                         | <i>Mollisia</i> sp. 1                                                                        | 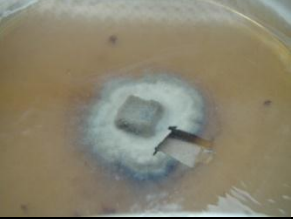 |

| Group | Gross morphology                                                                                       | No. of sequenced isolates | OTU identification                                                  |                                                                                      |
|-------|--------------------------------------------------------------------------------------------------------|---------------------------|---------------------------------------------------------------------|--------------------------------------------------------------------------------------|
| 12    | White mycelium, woolly floccose texture, irregular margins and medium growth rate.                     | 2                         | Pleosporales sp. 2                                                  | 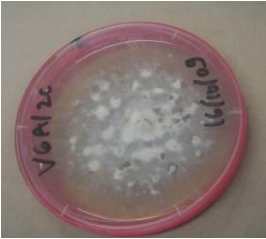  |
| 13    | Light brown mycelium with brown reverse, circular or regular margin, felt texture and fast growth rate | 5                         | Pleosporales sp. 2                                                  | 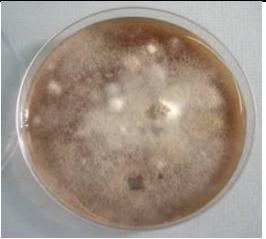  |
| 14    | White orange or yellowish mycelium, silky or felty texture, irregular margin, medium growth rate.      | 4                         | <i>Sporormiella</i> sp. 2<br><i>Sporormiella</i> sp. 5<br>(2 MOTUs) | 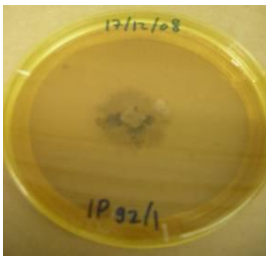 |

| Group | Gross morphology                                                                                                                                 | No. of sequenced isolates | OTU identification                                |                                                                                      |
|-------|--------------------------------------------------------------------------------------------------------------------------------------------------|---------------------------|---------------------------------------------------|--------------------------------------------------------------------------------------|
| 15    | White mycelium to blackish mycelium, thick, felty surface, irregular margin and medium growth rate.                                              | 3                         | <i>Sydowia polyspora</i>                          | 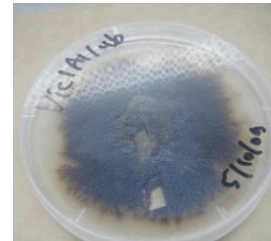  |
| 16    | White to light brown mycelium, brown reverse, irregular margin and medium growth rate.                                                           | 6                         | Helotiales sp. 1<br>Helotiales sp. 2<br>(2 MOTUs) | 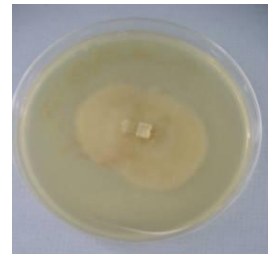  |
| 17    | White greyish mycelium, black reverse, silky texture, circular with radial streak, farinaceous black central patches, medium to fast growth rate | 3                         | <i>Biscogniauxia</i> sp.<br>1                     | 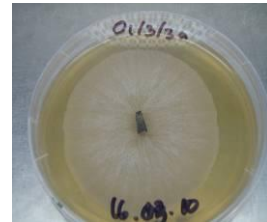 |

| Group | Gross morphology                                                                                    | No. of sequenced isolates | OTU identification             |                                                                                       |
|-------|-----------------------------------------------------------------------------------------------------|---------------------------|--------------------------------|---------------------------------------------------------------------------------------|
| 18    | White greyish mycelium, felt, zonate texture, irregular margin and slow growth rate                 | 2                         | <i>Lasiosphaeria</i> sp. 1     | 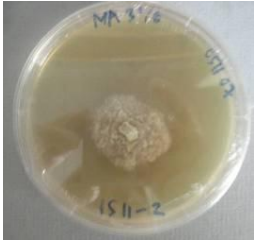   |
| 19    | Black mycelium, granular, with white pycnidia, slightly irregular margin and fast growth rate       | 2                         | <i>Strasseria geniculata</i>   | 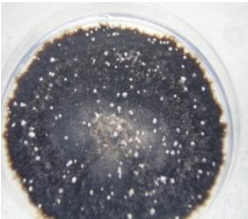   |
| 20    | White mycelium, thick silky texture, floccose patches, irregular margin, medium to fast growth rate | 2                         | <i>Chromelosporium carneum</i> | 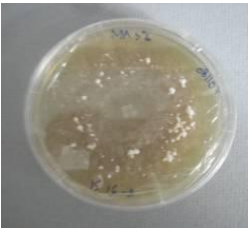  |
| 21    | White mycelium, lacunose texture, circular and fast growing.                                        | 3                         | <i>Penicillium</i> sp. 5       | 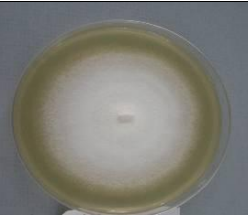 |

| Group | Gross morphology                                                                                   | No. of sequenced isolates | OTU identification                             |                                                                                       |
|-------|----------------------------------------------------------------------------------------------------|---------------------------|------------------------------------------------|---------------------------------------------------------------------------------------|
| 22    | White to black mycelium, felty texture, irregular margin, medium growth                            | 2                         | <i>Aureobasidium pullulans</i>                 | 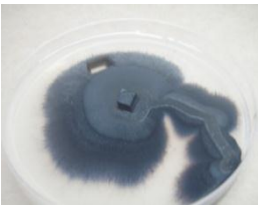   |
| 23    | White mycelium, thick cottony texture, radial patches irregular margin, medium to fast growth      | 3                         | Pezizales sp. 1<br>Pezizales sp. 2<br>(2 OTUs) | 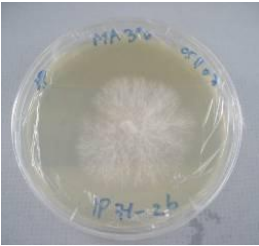   |
| 24    | Transparent or black mycelium, felty, zonate texture, irregular margin and medium growth rate.     | 1                         | <i>Ceuthospora pinastri</i>                    | 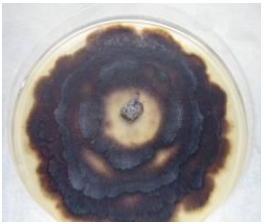  |
| 25    | White-greyish mycelium with brown reverse, felty texture, irregular margin and medium growth rate. | 1                         | Basidiomycete sp.<br>5                         | 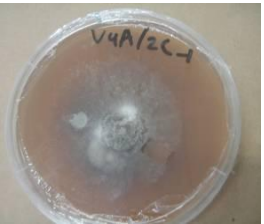 |
