# Supplementary material
Source: publisher figshare collection journal article supplement (https://tandf.figshare.com/articles/dataset/_/2868445)
Supplement: Supplementary file 1 [file 1 › tsfs_a_1092345_sm4310.pdf]

Table 2: OTUs and their frequency of detection and isolation, with criteria used for their identification, including sequence accession numbers.

| <b>Class;<br/>Order; Family</b>    | <b>OTU</b>                     | <b>N5<sup>1</sup></b> | <b>N8<sup>1</sup></b> | <b>CL<sup>3</sup></b> | <b>GenBank Accession</b> | <b>Criterion for identification</b>                                                                                                                                                                                                                                                                                                                                                                                                                                                          |
|------------------------------------|--------------------------------|-----------------------|-----------------------|-----------------------|--------------------------|----------------------------------------------------------------------------------------------------------------------------------------------------------------------------------------------------------------------------------------------------------------------------------------------------------------------------------------------------------------------------------------------------------------------------------------------------------------------------------------------|
| <b><u>Dothideomycetes</u></b>      |                                |                       |                       |                       |                          |                                                                                                                                                                                                                                                                                                                                                                                                                                                                                              |
| Botryosphaerales;<br>Family undet. | Botryosphaerales sp. 1         | 0                     | 2                     | 0                     | KM216369                 | Sequence similarity of 98% to AY843079, an unnamed fungal isolate from rock surfaces, and up to 86% to several species of Botryosphaerales, including KC869997, <i>Diplodia seriata</i> culture-collection CBS:134701 and FJ888478, <i>Diplodia alatafructa</i> CMW22721 and FJ888478, <i>Diplodia alatafructa</i> CMW22721 Sequence similarity up to 90% to several species of Botryosphaerales, including EU603293, <i>Botryosphaeria viticola</i> and EF591921, <i>Dothiorella moneti</i> |
|                                    | Botryosphaerales sp. 3         | 1                     | 0                     | 0                     | KM216350                 |                                                                                                                                                                                                                                                                                                                                                                                                                                                                                              |
| Capnodiales;<br>Family undet.      | Capnodiales sp. 1              | 0                     | 1                     | 0                     | KJ406762                 | Phylogenetic analysis, Figure 1                                                                                                                                                                                                                                                                                                                                                                                                                                                              |
|                                    | Capnodiales sp. 2              | 1                     | 1                     | 0                     | KJ406757                 | Phylogenetic analysis, Figure 1                                                                                                                                                                                                                                                                                                                                                                                                                                                              |
|                                    | Capnodiales sp. 3              | 1                     | 0                     | 0                     | KM216329                 | Phylogenetic analysis, Figure 1                                                                                                                                                                                                                                                                                                                                                                                                                                                              |
|                                    | <i>Phaeotheca fissurella</i>   | 3                     | 13                    | 0                     | KM216349                 | Sequence similarity of 99% to AJ244255.1, <i>Phaeotheca fissurella</i> CBS 520.89, less than 90% similarity to any other sequence from identified fungi.                                                                                                                                                                                                                                                                                                                                     |
| Davidiellaceae                     | <i>Davidiella</i> sp. 1        | 8                     | 3                     | 0                     | KM216336                 | Sequence similarity of 99.8% to a range of <i>Davidiella</i> and <i>Cladosporium</i> (anamorph of <i>Davidiella</i> ) species, including, <i>D. tassiana</i> ; <i>D. macrospora</i> ; <i>C. ramotenellum</i> ; <i>C. cucumerinum</i> .                                                                                                                                                                                                                                                       |
|                                    | Davidiellaceae sp. 1           | 3                     | 0                     | 0                     | KM216333                 | Sequence similarity of 93-94% to four species of <i>Rachicladosporium</i>                                                                                                                                                                                                                                                                                                                                                                                                                    |
|                                    | Davidiellaceae sp. 2           | 1                     | 0                     | 0                     | KM216347                 | Sequence similarity of 93-95% to four species of <i>Rachicladosporium</i> .                                                                                                                                                                                                                                                                                                                                                                                                                  |
| Mycosphaerellaceae                 | <i>Dothistroma septosporum</i> | 2                     | 16                    | 0                     | KJ406805                 | Phylogenetic analysis, Figure 2                                                                                                                                                                                                                                                                                                                                                                                                                                                              |

| Class;<br>Order; Family        | OTU                                         | N5 <sup>1</sup> | N8 <sup>1</sup> | CL <sup>3</sup> | GenBank Accession | Criterion for identification                                                                                   |
|--------------------------------|---------------------------------------------|-----------------|-----------------|-----------------|-------------------|----------------------------------------------------------------------------------------------------------------|
| Order undet.;<br>Family undet. | Mycosphaerellaceae sp. 1                    | 3               | 2               | 0               | KJ406789          | Phylogenetic analysis, Figure 2                                                                                |
|                                | Mycosphaerellaceae sp. 2                    | 0               | 1               | 0               | KJ406794          | Phylogenetic analysis, Figure 2                                                                                |
|                                | Mycosphaerellaceae sp. 3                    | 0               | 1               | 0               | KJ406799          | Phylogenetic analysis, Figure 2                                                                                |
|                                | <i>Phaeothecoidea</i> sp. 1                 | 4               | 0               | 0               | KJ406802          | Phylogenetic analysis, Figure 2                                                                                |
|                                | <i>Phaeothecoidea</i> sp. 2                 | 1               | 0               | 0               | KJ406792          | Phylogenetic analysis, Figure 2                                                                                |
|                                | <i>Phaeothecoidea</i> sp. 3                 | 0               | 2               | 0               | KJ406797          | Phylogenetic analysis, Figure 2                                                                                |
|                                | <i>Pseudocercospora</i> sp. 1               | 1               | 0               | 0               | KJ406795          | Phylogenetic analysis, Figure 2                                                                                |
|                                | <i>Ramularia stellenboschensis</i>          | 1               | 0               | 0               | KJ406791          | Phylogenetic analysis, Figure 2                                                                                |
|                                |                                             |                 |                 |                 |                   |                                                                                                                |
| Teratosphaeriaceae             | Dothideomycetes sp. 2                       | 1               | 1               | 0               | KJ406840          | Sequence similarity of 98-99% to a range of Dothideomycete spp., including AJ279448, <i>Epicoccum nigrum</i> . |
|                                | <i>Devriesia</i> sp.                        | 0               | 1               | 0               | KM216374          | Sequence similarity of 93% to AY692088.1, <i>Devriesia thermoturans</i>                                        |
|                                | <i>Teratosphaeria</i> aff. <i>associata</i> | 2               | 0               | 0               | KJ406767          | Phylogenetic analysis, Figure 1                                                                                |
|                                | <i>Teratosphaeria</i> aff. <i>capensis</i>  | 1               | 0               | 0               | KJ406771          | Phylogenetic analysis, Figure 1                                                                                |
|                                | <i>Teratosphaeria</i> aff. <i>parva</i>     | 1               | 4               | 0               | KJ406775          | Phylogenetic analysis, Figure 1                                                                                |
|                                | <i>Teratosphaeria</i> aff. <i>suttonii</i>  | 1               | 0               | 0               | KJ406763          | Phylogenetic analysis, Figure 1                                                                                |
|                                | Teratosphaeriaceae sp. 01                   | 0               | 4               | 0               | KJ406774          | Phylogenetic analysis, Figure 1                                                                                |
|                                | Teratosphaeriaceae sp. 02                   | 0               | 2               | 0               | KJ406778          | Phylogenetic analysis, Figure 1                                                                                |
|                                | Teratosphaeriaceae sp. 03                   | 3               | 12              | 0               | KM216368          | Phylogenetic analysis, Figure 1                                                                                |

| <b>Class;<br/>Order; Family</b> | <b>OTU</b>                   | <b>N5<sup>1</sup></b> | <b>N8<sup>1</sup></b> | <b>CL<sup>3</sup></b> | <b>GenBank Accession</b> | <b>Criterion for identification</b> |
|---------------------------------|------------------------------|-----------------------|-----------------------|-----------------------|--------------------------|-------------------------------------|
|                                 | Teratosphaeriaceae sp.<br>04 | 1                     | 7                     | 0                     | KJ406777                 | Phylogenetic analysis, Figure 1     |
|                                 | Teratosphaeriaceae sp.<br>05 | 2                     | 0                     | 0                     | KJ406766                 | Phylogenetic analysis, Figure 1     |
|                                 | Teratosphaeriaceae sp.<br>06 | 2                     | 0                     | 0                     | KJ406768                 | Phylogenetic analysis, Figure 1     |
|                                 | Teratosphaeriaceae sp.<br>07 | 1                     | 0                     | 0                     | KJ406760                 | Phylogenetic analysis, Figure 1     |
|                                 | Teratosphaeriaceae sp.<br>08 | 2                     | 2                     | 0                     | KJ406759                 | Phylogenetic analysis, Figure 1     |
|                                 | Teratosphaeriaceae sp.<br>09 | 1                     | 0                     | 0                     | KJ406770                 | Phylogenetic analysis, Figure 1     |
|                                 | Teratosphaeriaceae sp.<br>10 | 3                     | 0                     | 0                     | KJ406764                 | Phylogenetic analysis, Figure 1     |
|                                 | Teratosphaeriaceae sp.<br>11 | 0                     | 1                     | 0                     | KJ406783                 | Phylogenetic analysis, Figure 1     |
|                                 | Teratosphaeriaceae sp.<br>12 | 0                     | 1                     | 0                     | KJ406782                 | Phylogenetic analysis, Figure 1     |
|                                 | Teratosphaeriaceae sp.<br>13 | 0                     | 6                     | 0                     | KJ406779                 | Phylogenetic analysis, Figure 1     |
|                                 | Teratosphaeriaceae sp.<br>14 | 4                     | 0                     | 0                     | KJ406758                 | Phylogenetic analysis, Figure 1     |
|                                 | Teratosphaeriaceae sp.<br>15 | 0                     | 4                     | 0                     | KJ406776                 | Phylogenetic analysis, Figure 1     |
|                                 | Teratosphaeriaceae sp.<br>16 | 1                     | 5                     | 0                     | KJ406786                 | Phylogenetic analysis, Figure 1     |
|                                 | Teratosphaeriaceae sp.<br>17 | 1                     | 0                     | 0                     | KJ406785                 | Phylogenetic analysis, Figure 1     |
|                                 | Teratosphaeriaceae sp.<br>18 | 2                     | 4                     | 0                     | KJ406787                 | Phylogenetic analysis, Figure 1     |
|                                 | Teratosphaeriaceae sp.<br>19 | 1                     | 0                     | 0                     | KJ406788                 | Phylogenetic analysis, Figure 1     |
|                                 | Teratosphaeriaceae sp.       | 0                     | 1                     | 0                     | KJ406780                 | Phylogenetic analysis, Figure 1     |

| Class;<br>Order; Family | OTU                               | N5 <sup>1</sup> | N8 <sup>1</sup> | CL <sup>3</sup> | GenBank Accession | Criterion for identification                                                                                                                                                  |
|-------------------------|-----------------------------------|-----------------|-----------------|-----------------|-------------------|-------------------------------------------------------------------------------------------------------------------------------------------------------------------------------|
|                         | 20                                |                 |                 |                 |                   |                                                                                                                                                                               |
|                         | Teratosphaeriaceae sp.            | 2               | 6               | 0               | KJ406769          | Phylogenetic analysis, Figure 1                                                                                                                                               |
|                         | 21                                |                 |                 |                 |                   |                                                                                                                                                                               |
|                         | Teratosphaeriaceae sp.            | 0               | 3               | 0               | KJ406781          | Phylogenetic analysis, Figure 1                                                                                                                                               |
|                         | 22                                |                 |                 |                 |                   |                                                                                                                                                                               |
|                         | Teratosphaeriaceae sp.            | 9               | 33              | 0               | KJ406784          | Phylogenetic analysis, Figure 1                                                                                                                                               |
|                         | 23                                |                 |                 |                 |                   |                                                                                                                                                                               |
|                         | Teratosphaeriaceae sp.            | 0               | 5               | 0               | KM216373          | Phylogenetic analysis, Figure 1                                                                                                                                               |
|                         | 25                                |                 |                 |                 |                   |                                                                                                                                                                               |
|                         | Teratosphaeriaceae sp.            | 15              | 2               | 0               | KJ406761          | Phylogenetic analysis, Figure 1                                                                                                                                               |
|                         | 26                                |                 |                 |                 |                   |                                                                                                                                                                               |
| Dothideales;            |                                   |                 |                 |                 |                   |                                                                                                                                                                               |
| Dothioraceae            | <i>Aureobasidium pullulans</i>    | 2               | 2               | 2               | KJ407004          | Phylogenetic analysis, Figure 3                                                                                                                                               |
|                         | <i>Sydowia polyspora</i>          | 10              | 2               | 3               | KJ407006          | Phylogenetic analysis, Figure 3                                                                                                                                               |
| Family undet.           | Dothideales sp. 1                 | 1               | 0               | 0               | KJ406831          | Phylogenetic analysis, Figure 3                                                                                                                                               |
| Pleosporales            |                                   |                 |                 |                 |                   |                                                                                                                                                                               |
| Didymellaceae           | <i>Leptosphaerulina</i> sp. 1     | 1               | 0               | 0               | KJ406837          | Sequence similarity of up to 99.8% to accessions from several <i>Leptosphaerulina</i> spp., including KJ796400, <i>L. chartarum</i> .                                         |
|                         | Didymellaceae sp. 2               | 0               | 3               | 0               | KM216364          | Sequence similarity of 98% to a range of <i>Peyronellaea</i> and <i>Phoma</i> species, including GU237818, <i>Peyronellaea aurea</i> .                                        |
| Lophiostomataceae       | <i>Lophiostoma corticola</i>      | 0               | 2               | 1               | KJ407013          | Sequence similarity of 99.5% to multiple accessions of <i>Lophiostoma corticola</i> , including HE774481.                                                                     |
| Montagnulaceae          | <i>Paraphaeosphaeria michotii</i> | 3               | 0               | 0               | KJ406849          | Sequence similarity of 99.8% to multipole accessions of <i>Paraphaeosphaeria michotii</i> , including JX496079, and 98% similarity to other <i>Paraphaeosphaeria</i> species. |
| Phaeosphaeriaceae       | <i>Phaeosphaeria</i> sp. 3        | 1               | 0               | 0               | KJ406845          | Sequence similarity of 98-99% to a range of                                                                                                                                   |

| <b>Class;<br/>Order; Family</b> | <b>OTU</b>                         | <b>N5<sup>1</sup></b> | <b>N8<sup>1</sup></b> | <b>CL<sup>3</sup></b> | <b>GenBank Accession</b> | <b>Criterion for identification</b>                                                                                                                                                                                                                                                                                 |
|---------------------------------|------------------------------------|-----------------------|-----------------------|-----------------------|--------------------------|---------------------------------------------------------------------------------------------------------------------------------------------------------------------------------------------------------------------------------------------------------------------------------------------------------------------|
| Pleosporaceae                   | <i>Allewia eureka</i>              | 0                     | 1                     | 0                     | KM216382                 | <i>Phaeosphaeria</i> species, including JX981464, <i>P. culmorum</i> .<br>Sequence similarity of 99% to JN383490, <i>Embellisia eureka</i> (syn. <i>Allewia eureka</i> ), and up to 97% sequence similarity to several other species of <i>Alternaria</i> including, KC584222, <i>A. triglochynicola</i> CBS 119676 |
| Sporormiaceae                   | <i>Preussia/Sporormiella</i> sp. 1 | 0                     | 1                     | 0                     | KJ406868                 | Phylogenetic analysis, Figure 4                                                                                                                                                                                                                                                                                     |
|                                 | <i>Preussia/Sporormiella</i> sp. 2 | 0                     | 0                     | 3                     | KJ407017                 | Phylogenetic analysis, Figure 4                                                                                                                                                                                                                                                                                     |
|                                 | <i>Preussia/Sporormiella</i> sp. 3 | 1                     | 0                     | 0                     | KJ406867                 | Phylogenetic analysis, Figure 4                                                                                                                                                                                                                                                                                     |
|                                 | <i>Preussia/Sporormiella</i> sp. 4 | 0                     | 1                     | 0                     | KJ406866                 | Phylogenetic analysis, Figure 4                                                                                                                                                                                                                                                                                     |
|                                 | <i>Preussia/Sporormiella</i> sp. 5 | 0                     | 1                     | 1                     | KJ407014                 | Phylogenetic analysis, Figure 4                                                                                                                                                                                                                                                                                     |
|                                 | <i>Preussia/Sporormiella</i> sp. 6 | 0                     | 1                     | 0                     | KJ406865                 | Phylogenetic analysis, Figure 4                                                                                                                                                                                                                                                                                     |
|                                 | <i>Preussia/Sporormiella</i> sp. 7 | 2                     | 0                     | 0                     | KJ406863                 | Phylogenetic analysis, Figure 4                                                                                                                                                                                                                                                                                     |
| Family undet.                   | Pleosporales sp. 1                 | 0                     | 5                     | 0                     | KJ406858                 | Sequence similarity of up to 97% to several species of <i>Peyronellaea</i> and <i>Phoma</i> , including GU237847 <i>Peyronellaea obtusa</i>                                                                                                                                                                         |
|                                 | Pleosporales sp. 2                 | 2                     | 1                     | 7                     | KJ407009                 | Sequence similarity of 99-100% to species of <i>Microsphaeropsis</i> , <i>Phoma</i> , and <i>Atradiidymella</i> , including JX681101, <i>Microsphaeropsis olivacea</i> .                                                                                                                                            |
|                                 | Pleosporales sp. 3                 | 0                     | 1                     | 0                     | KJ406852                 | Sequence similarity of 99-100% to a range of Pleosporales species, including JX496099, <i>Paraconiothyrium brasiliense</i> .                                                                                                                                                                                        |
|                                 | Pleosporales sp. 4                 | 0                     | 2                     | 0                     | KJ406853                 | Sequence identity with a range of Pleosporales species, including EU295638, <i>Paraconiothyrium brasiliense</i> .                                                                                                                                                                                                   |

| <b>Class;<br/>Order; Family</b>         | <b>OTU</b>                    | <b>N5<sup>1</sup></b> | <b>N8<sup>1</sup></b> | <b>CL<sup>3</sup></b> | <b>GenBank Accession</b> | <b>Criterion for identification</b>                                                                                                                                                                                                                                                                                                                                                                                                                                                           |
|-----------------------------------------|-------------------------------|-----------------------|-----------------------|-----------------------|--------------------------|-----------------------------------------------------------------------------------------------------------------------------------------------------------------------------------------------------------------------------------------------------------------------------------------------------------------------------------------------------------------------------------------------------------------------------------------------------------------------------------------------|
|                                         | Pleosporales sp. 6            | 0                     | 1                     | 0                     | KM216359                 | Sequence similarity of up to 93% to a range of Pleosporales species, including EU295638, <i>Paraconiothyrium brasiliense</i> .                                                                                                                                                                                                                                                                                                                                                                |
| <b><u>Eurotiomycetes</u></b>            |                               |                       |                       |                       |                          |                                                                                                                                                                                                                                                                                                                                                                                                                                                                                               |
| Chaetothyriales;<br>Herpotrichiellaceae | <i>Exophiala eucalyptorum</i> | 2                     | 0                     | 0                     | KJ406880                 | Sequence similarity of 99.6-100% to two accessions of <i>Exophiala eucalyptorum</i> , including EU035417, sequence similarity of up to 96% to other Chaetothyriales species.<br>Sequence similarity of 98% to DQ914677, <i>Exophiala</i> sp., sequence similarity of up to 83% to other Chaetothyriales species.<br>Sequence similarity of 95-96% to two accessions of <i>Exophiala eucalyptorum</i> , including EU035417, sequence similarity of up to 90% to other Chaetothyriales species. |
|                                         | <i>Exophiala</i> sp. 1        | 0                     | 1                     | 0                     | KJ406883                 |                                                                                                                                                                                                                                                                                                                                                                                                                                                                                               |
|                                         | <i>Exophiala</i> sp. 2        | 0                     | 1                     | 0                     | KJ406881                 |                                                                                                                                                                                                                                                                                                                                                                                                                                                                                               |
| Family undet.                           | Chaetothyriales sp. 1         | 3                     | 0                     | 0                     | KJ406877                 | Sequence similarity of 80-89% to a range of <i>Phaeococcomyces</i> species, including KJ152783, <i>P. mexicanus</i> .                                                                                                                                                                                                                                                                                                                                                                         |
|                                         | Chaetothyriales sp. 2         | 4                     | 1                     | 0                     | KJ406875                 | Sequence similarity of 80-87% to a range of <i>Phaeococcomyces</i> species, including KJ152783, <i>P. mexicanus</i> .                                                                                                                                                                                                                                                                                                                                                                         |
|                                         | Chaetothyriales sp. 3         | 1                     | 0                     | 0                     | KJ406884                 | Sequence similarity up to 93% to a range of Chaetothyriales spp., including EU035415, <i>Cyphellophora hylomeconis</i> .                                                                                                                                                                                                                                                                                                                                                                      |
| Eurotiales;<br>Trichocomaceae           | <i>Aspergillus</i> sp. 1      | 0                     | 1                     | 0                     | KJ406885                 | Sequence similarity of 93-94% to several accessions of <i>A. conicus</i> , including EF652039, up to 91% similarity to other <i>Aspergillus</i> species.<br>Sequence similarity of 99% to several species of <i>Aspergillus</i> , including AY373877, <i>A. ustus</i> .<br>Sequence similarity of 99% to several species of                                                                                                                                                                   |
|                                         | <i>Aspergillus</i> sp. 2      | 0                     | 6                     | 0                     | KJ406901                 |                                                                                                                                                                                                                                                                                                                                                                                                                                                                                               |
|                                         | <i>Aspergillus</i> sp. 3      | 0                     | 0                     | 1                     | KJ407020                 |                                                                                                                                                                                                                                                                                                                                                                                                                                                                                               |

| <u>Class;<br/>Order; Family</u> | OTU                                      | N5 <sup>1</sup> | N8 <sup>1</sup> | CL <sup>3</sup> | GenBank Accession | Criterion for identification                                                                                                                                                         |
|---------------------------------|------------------------------------------|-----------------|-----------------|-----------------|-------------------|--------------------------------------------------------------------------------------------------------------------------------------------------------------------------------------|
|                                 | <i>Penicillium</i> sp.1                  | 1               | 0               | 0               | KJ406888          | <i>Aspergillus</i> , including KJ775589, <i>A. versicolor</i> .<br>Sequence similarity of 96% to several species of <i>Penicillium</i> , including KJ775589, <i>P. chrysogenum</i> . |
|                                 | <i>Penicillium</i> sp. 2                 | 4               | 0               | 0               | KJ406887          | Sequence similarity of 96% to several species of <i>Penicillium</i> , including AY373906, <i>P. corylophilum</i> .                                                                   |
|                                 | <i>Penicillium</i> sp. 3                 | 1               | 0               | 0               | KJ406890          | Sequence similarity of 96% to several species of <i>Penicillium</i> , including AF033463, <i>P. namyslowskii</i> .                                                                   |
|                                 | <i>Penicillium</i> sp. 4                 | 1               | 0               | 0               | KJ406894          | Sequence identity with several species of <i>Penicillium</i> , including KJ775635, <i>P. glabrum</i> .                                                                               |
|                                 | <i>Penicillium</i> sp. 5                 | 0               | 0               | 3               | KJ407018          | Sequence similarity of 95% to several species of <i>Penicillium</i> , including AY373898, <i>P. brevicompactum</i> .                                                                 |
| <b><u>Lecanoromycetes</u></b>   |                                          |                 |                 |                 |                   |                                                                                                                                                                                      |
| Acarosporales;<br>Family undet. | Acarosporales sp. 1                      | 0               | 1               | 0               | KM624595          | Sequence similarity of up to 88% to several <i>Acarospora</i> species, including GU184115.1, <i>A. rosulata</i> .                                                                    |
| <b><u>Leotiomyces</u></b>       |                                          |                 |                 |                 |                   |                                                                                                                                                                                      |
| Helotiales;<br>Dermateaceae     | <i>Mollisia</i> sp. 1                    | 0               | 0               | 2               | KM216327          | Over 99% similarity to several species of <i>Mollisia</i> , including <i>M. melaleuca</i> (AY259136), <i>M. cinerea</i> (AY259135), and <i>M. fusca</i> (AY259137)                   |
| Helotiaceae                     | <i>Varicosporium</i> aff. <i>elodeae</i> | 1               | 0               | 0               | KM216334          | Sequence similarity of 98% to several accessions of <i>Varicosporium elodeae</i> , including JN655610.1.                                                                             |
| Sclerotiniaceae                 | <i>Torrendiella eucalypti</i>            | 2               | 0               | 0               | KM216355          | Sequence similarity of 99% to AY755335, <i>Torrendiella eucalypti</i> , and 95% sequence                                                                                             |

| Class;<br>Order; Family        | OTU                                  | N5 <sup>1</sup> | N8 <sup>1</sup> | CL <sup>3</sup> | GenBank Accession | Criterion for identification                                                                                                                                                                                                  |
|--------------------------------|--------------------------------------|-----------------|-----------------|-----------------|-------------------|-------------------------------------------------------------------------------------------------------------------------------------------------------------------------------------------------------------------------------|
| Family undet.                  | <i>Cyclaneusma minus</i><br>'simile' | 8               | 17              | 2               | KM216324          | similarity to several other species of <i>Torreodiella</i><br>Sequence identity with reference isolates of <i>Cyclaneusma minus</i> 'simile' and 90-91% sequence similarity to <i>C. minus</i> 'verum' and <i>C. niveum</i> . |
|                                | <i>Cyclaneusma minus</i><br>'verum'  | 9               | 2               | 3               | KJ407021          | Sequence identity with reference isolates of <i>Cyclaneusma minus</i> 'verum', 99% sequence similarity to <i>C. niveum</i> and 90% sequence similarity to <i>C. minus</i> 'simile'.                                           |
|                                | Helotiales sp. 1                     | 0               | 0               | 4               | KM216322          | Sequence similarity of up to 98% to several Helotiales species, including <i>Cadophora malorum</i> and <i>Mollisia dextrinospora</i>                                                                                          |
|                                | Helotiales sp. 2                     | 0               | 0               | 2               | KM216321          | Sequence similarity of 99% to HQ608100.1, unidentified ascomycete, and up to 94% to several Helotiales species including EU940165.1, <i>Cyathicula microspora</i> .                                                           |
|                                | Helotiales sp. 3                     | 0               | 1               | 0               | KM216383          | Sequence similarity of up to 92% to several Helotiales species, including KC464643 <i>Lachnellula tricolor</i> .                                                                                                              |
|                                | Helotiales sp. 4                     | 1               | 0               | 0               | KM216351          | Sequence similarity of up to 86% to several Helotiales species, including <i>Arachnopeziza</i> spp.                                                                                                                           |
|                                | <i>Meliniomyces</i> sp.              | 1               | 0               | 0               | KM216335          | Sequence similarity of 98% to several accessions of <i>Meliniomyces bicolor</i> , including HQ157926.1.                                                                                                                       |
| Phacidiales;<br>Phacidiaceae   | <i>Phacidium lacerum</i>             | 2               | 1               | 1               | KF013549          | Sequence identity with reference isolate NZFS504, 99% sequence similarity to <i>Strasseria geniculata</i> , KF013550.                                                                                                         |
| Order undet.,<br>Family undet. | Leotiomycetes sp. 1                  | 3               | 0               | 0               | KJ406966          | Sequence similarity of 90-91% to a range of <i>Collophora</i> spp., including JN808839, <i>C. hispanica</i> .                                                                                                                 |
|                                | Leotiomycetes sp. 2                  | 0               | 1               | 0               | KJ406972          | Sequence similarity of up to 90% to a range of                                                                                                                                                                                |

| <b>Class;<br/>Order; Family</b>     | <b>OTU</b>                                                         | <b>N5<sup>1</sup></b> | <b>N8<sup>1</sup></b> | <b>CL<sup>3</sup></b> | <b>GenBank Accession</b> | <b>Criterion for identification</b>                                                                                                                           |
|-------------------------------------|--------------------------------------------------------------------|-----------------------|-----------------------|-----------------------|--------------------------|---------------------------------------------------------------------------------------------------------------------------------------------------------------|
|                                     |                                                                    |                       |                       |                       |                          | Leotiomycete spp., including HQ533008, <i>Claussenomyces</i> sp.                                                                                              |
| Rhytismatales;<br>Rhytismataceae    | <i>Lophodermium aff. conigenum</i><br><i>Lophodermium pinastri</i> | 4<br>14               | 0<br>12               | 21<br>78              | KJ407029<br>KJ407045     | Phylogenetic analysis, Figure 5; Supplementary Figure 1<br>Phylogenetic analysis, Figure 6; Supplementary Figure 2                                            |
| Family undet.                       | <i>Fulvoflamma</i> sp.                                             | 1                     | 0                     | 0                     | KM216341                 | Sequence similarity of 92% to DQ195779, <i>Fulvoflamma eucalypti</i> CPC 11243, and up to 99% to unknown Leotiomycetes species.                               |
| <b><u>Pezizomycetes</u></b>         |                                                                    |                       |                       |                       |                          |                                                                                                                                                               |
| Pezizales;<br>Family undet.         | Pezizales sp. 1                                                    | 0                     | 0                     | 2                     | KJ407055                 | Sequence similarity of 97% to EU552114, <i>Conoplea fusca</i> CBS 113475 and up to 95% to several species of <i>Plectaria</i>                                 |
|                                     | Pezizales sp. 3                                                    | 0                     | 0                     | 1                     | KJ407058                 | Sequence similarity of up to 92% to several <i>Plectania</i> spp.                                                                                             |
| Pezizaceae                          | <i>Chromelosporium carneum</i>                                     | 0                     | 0                     | 2                     | KJ407060                 | Sequence identity with several accessions of <i>Chromelosporium carneum</i> , including JF440586 and up to 91% similarity to other Pezizaceae spp.            |
| <b><u>Saccharomycetes</u></b>       |                                                                    |                       |                       |                       |                          |                                                                                                                                                               |
| Saccharomycetales;<br>Family undet. | <i>Candida sake</i>                                                | 0                     | 1                     | 0                     | KM216377                 | Sequence similarity of 99% to several accessions of <i>Candida sake</i> including AJ549822, and up to 90% similarity to several other <i>Candida</i> species. |
| <b><u>Sordariomycetes</u></b>       |                                                                    |                       |                       |                       |                          |                                                                                                                                                               |
| Hypocreales;                        |                                                                    |                       |                       |                       |                          |                                                                                                                                                               |

| <b>Class;<br/>Order; Family</b>    | <b>OTU</b>                       | <b>N5<sup>1</sup></b> | <b>N8<sup>1</sup></b> | <b>CL<sup>3</sup></b> | <b>GenBank Accession</b> | <b>Criterion for identification</b>                                                                                                                                                                   |
|------------------------------------|----------------------------------|-----------------------|-----------------------|-----------------------|--------------------------|-------------------------------------------------------------------------------------------------------------------------------------------------------------------------------------------------------|
| Nectriaceae                        | <i>Fusarium</i> sp.              | 0                     | 0                     | 1                     | KM216320                 | Sequence similarity of 98% to several accessions of <i>Fusarium lateritium</i> , including FJ228190, and up to 96% to several other <i>Fusarium</i> and <i>Gibberella</i> species.                    |
| Coniochaetales;<br>Coniochaetaceae | <i>Coniochaeta</i> sp. 1         | 0                     | 0                     | 73                    | KJ407067                 | Phylogenetic analysis, Figure 7.                                                                                                                                                                      |
|                                    | <i>Coniochaeta</i> sp. 2         | 0                     | 0                     | 4                     | KJ407066                 | Phylogenetic analysis, Figure 7.                                                                                                                                                                      |
| Sordariales;<br>Lasiosphaeriaceae  | <i>Bagadiella</i> sp. 1          | 1                     | 0                     | 0                     | KM216344                 | Sequence similarity of 98-99% to several <i>Bagadiella</i> species, including JF951141, <i>B. victoriae</i> CPC 17688; GQ303269, <i>B. lunata</i> CBS 124762 and JF951142, <i>B. koalae</i> CPC 17682 |
|                                    | <i>Fimetariella rabenhorstii</i> | 0                     | 0                     | 9                     | KJ407070                 | Sequence similarity of 99-100% to multiple accessions of <i>Fimetariella rabenhorstii</i> , including KM519659 and up to 93% to other Sordariomycete spp.                                             |
|                                    | <i>Lasiosphaeria</i> sp. 1       | 0                     | 0                     | 2                     | KJ407064                 | Sequence similarity of 97-99% to several accessions of <i>Lasiosphaeria lanuginosa</i> and <i>L. ovina</i> , including AY587916 and up to 93% to other <i>Lasiosphaeria</i> spp.                      |
| Family undet.                      | Sordariales sp. 1                | 1                     | 0                     | 0                     | KJ406980                 | Sequence similarity of up to 90% to a range of Sordariales spp., including GQ154539, <i>Coniochaeta africana</i> .                                                                                    |
| Xylariales;<br>Amphisphaeriaceae   | <i>Pestalotiopsis</i> sp. 1      | 0                     | 0                     | 1                     | KJ406990                 | Sequence similarity of up to 99.4% to a range of <i>Pestalotiopsis</i> spp., including EU342212, <i>P. neglecta</i> .                                                                                 |
|                                    | <i>Pestalotiopsis</i> sp. 2      | 1                     | 0                     | 0                     | KJ406983                 | Sequence similarity of up to 98% to a range of <i>Pestalotiopsis</i> spp., including EU552147, <i>P. maculiformans</i> .                                                                              |
| Xylariaceae                        | <i>Anthostomella pinea</i>       | 0                     | 0                     | 3                     | KJ406992                 | Sequence similarity of 99.4% to HQ599578,                                                                                                                                                             |

| Class;<br>Order; Family | OTU                        | N5 <sup>1</sup> | N8 <sup>1</sup> | CL <sup>3</sup> | GenBank Accession | Criterion for identification                                                                                                                                                                                                                                                                                 |
|-------------------------|----------------------------|-----------------|-----------------|-----------------|-------------------|--------------------------------------------------------------------------------------------------------------------------------------------------------------------------------------------------------------------------------------------------------------------------------------------------------------|
|                         | <i>Biscogniauxia</i> sp. 1 | 0               | 0               | 3               | KJ406987          | <i>Anthostomella pinea</i> , less than 90% sequence similarity to sequences from any other identified fungi available on the INSDs.<br>Sequence similarity of 99% to JN225897, <i>Biscogniauxia</i> sp., and up to 96% to several <i>Biscogniauxia</i> species, including JX507805, <i>B. uniapiculata</i> . |
|                         | <i>Nemania diffusa</i>     | 0               | 0               | 13              | KJ406996          | Sequence similarity of 98-99% to multiple accessions of <i>Nemania diffusa</i> , including DQ68238.                                                                                                                                                                                                          |
|                         | <i>Rosellinia</i> sp. 1    | 0               | 0               | 1               | KJ406999          | Sequence similarity of up to 94% to several <i>Rosellinia</i> species, including KC477236, <i>R. corticium</i> .                                                                                                                                                                                             |
|                         | <i>Xylaria castorea</i>    | 0               | 0               | 3               | KJ406994          | Sequence identity with three accessions of <i>Xylaria castorea</i> , including JN225908, and up to 97% sequence similarity with a range of other <i>Xylaria</i> species.                                                                                                                                     |
|                         | Xylariaceae sp. 1          | 0               | 0               | 19              | KJ407000          | Sequence similarity of 99% to JN225905.1, an unidentified Xylariaceae, and 86-91% to several species of <i>Hypoxylon</i> , including JQ009321, <i>H. vinosopulvinatum</i> .                                                                                                                                  |
|                         | Xylariaceae sp. 2          | 0               | 0               | 7               | KJ406985          | Sequence similarity of up to 85% to several <i>Annulohypoxylon</i> and <i>Hypoxylon</i> species, including EF026139, <i>Annulohypoxylon squamulosus</i> .                                                                                                                                                    |
|                         | Xylariaceae sp. 3          | 0               | 0               | 1               | KJ406986          | Sequence similarity of 99% to JN225894, an unidentified Xylariaceae, and up to 93% to several <i>Hypoxylon</i> species, including JN979427, <i>H. hypomiltum</i> .                                                                                                                                           |
|                         | Xylariaceae sp. 4          | 0               | 0               | 1               | KJ406984          | Sequence similarity of up to 83% to several <i>Hypoxylon</i> species, including KC968932, <i>H. rickii</i> .                                                                                                                                                                                                 |

Ascomycota;

| <b>Class;<br/>Order; Family</b> | <b>OTU</b>                                  | <b>N5<sup>1</sup></b> | <b>N8<sup>1</sup></b> | <b>CL<sup>3</sup></b> | <b>GenBank Accession</b> | <b>Criterion for identification</b>                                                                                                                                                                                                                                                                             |
|---------------------------------|---------------------------------------------|-----------------------|-----------------------|-----------------------|--------------------------|-----------------------------------------------------------------------------------------------------------------------------------------------------------------------------------------------------------------------------------------------------------------------------------------------------------------|
| Class, Order and Family undet.  | Ascomycota sp. 1                            | 3                     | 7                     | 0                     | KM216353                 | High sequence similarity in the 5.8S region only to a range of ascomycete species including AY843154.1, <i>Phaeococcomyces nigricans</i> . Sequence similarity of 95% to AJ244255.1, <i>Phaeotheca fissurella</i> CBS 520.89, up to 88% similarity to a range of other genera including <i>Teratosphaeria</i> . |
|                                 | Ascomycota sp. 2                            | 0                     | 11                    | 0                     | KM216358                 |                                                                                                                                                                                                                                                                                                                 |
|                                 | Ascomycota sp. 3                            | 1                     | 0                     | 0                     | KM216354                 |                                                                                                                                                                                                                                                                                                                 |
|                                 | Ascomycota sp. 4                            | 0                     | 1                     | 0                     | KM216378                 | High sequence similarity in the 5.8S region only to a range of ascomycete species including AY843154.1, <i>Phaeococcomyces nigricans</i> , up to 87% similarity to several uncultured ascomycete clones, including FR682186.1.                                                                                  |
|                                 | Ascomycota sp. 6                            | 0                     | 1                     | 0                     | KM216360                 | High sequence similarity in the 5.8S region only to a range of ascomycete species including FJ172275.1, <i>Aquapoterium pinicola</i> .                                                                                                                                                                          |
|                                 | Ascomycota sp. 8                            | 2                     | 0                     | 0                     | KJ406964                 | High sequence similarity in the 5.8S region only to a range of ascomycete species including JN628167.1, <i>Scleroconidioma sphagnicola</i> . Up to 87% sequence similarity to a range of Ascomycota, mainly species of <i>Phacidium</i> and other Phacidiales.                                                  |
|                                 | <i>Strasseria geniculata</i>                | 2                     | 6                     | 3                     | KJ407023                 | Sequence identity with reference isolates NZFS506 and MC7964/2, 99% similarity to <i>Phacidium lacerum</i> KF013549.                                                                                                                                                                                            |
| <b><u>Agaricomycetes</u></b>    |                                             |                       |                       |                       |                          |                                                                                                                                                                                                                                                                                                                 |
| Agaricales;                     |                                             |                       |                       |                       |                          |                                                                                                                                                                                                                                                                                                                 |
| Physalacriaceae                 | <i>Armillaria</i> aff. <i>luteobubalina</i> | 2                     | 0                     | 0                     | KM624597                 | Sequence similarity of 98% to several accessions of <i>Armillaria luteobubalina</i> , including AF394916.1,                                                                                                                                                                                                     |
| Strophariaceae                  | <i>Pholiota multicingulata</i>              | 2                     | 0                     | 0                     | KM216337                 | Sequence identical to HQ533029, <i>Pholiota multicingulata</i> , and up to 93% similarity to several other <i>Pholiota</i> species.                                                                                                                                                                             |

| <b>Class;<br/>Order; Family</b> | <b>OTU</b>                                   | <b>N5<sup>1</sup></b> | <b>N8<sup>1</sup></b> | <b>CL<sup>3</sup></b> | <b>GenBank Accession</b> | <b>Criterion for identification</b>                                                                                                                                                         |
|---------------------------------|----------------------------------------------|-----------------------|-----------------------|-----------------------|--------------------------|---------------------------------------------------------------------------------------------------------------------------------------------------------------------------------------------|
| Boletales;                      |                                              |                       |                       |                       |                          |                                                                                                                                                                                             |
| Serpulaceae                     | <i>Serpula himantioides</i>                  | 1                     | 0                     | 0                     | KM216346                 | Sequence similarity of 99.5% to many accessions of <i>Serpula himantioides</i> , including GU187545.1 and 96% to <i>S. lacrymans</i> .                                                      |
| Cantharellales;                 |                                              |                       |                       |                       |                          |                                                                                                                                                                                             |
| Ceratobasidiaceae               | <i>Ceratobasidium</i> sp. 1                  | 0                     | 0                     | 2                     | KM216319                 | Sequence similarity of 95% to AJ427401 <i>Ceratobasidium papillatum</i> , and up to 92% similarity to several other <i>Ceratobasidium</i> and <i>Rhizoctonia</i> species.                   |
| <b><u>Tremellomycetes</u></b>   |                                              |                       |                       |                       |                          |                                                                                                                                                                                             |
| Cystofilobasidiales;            |                                              |                       |                       |                       |                          |                                                                                                                                                                                             |
| Cystofilobasidiaceae            | <i>Udeniomyces pyricola</i>                  | 0                     | 1                     | 0                     | KM216371                 | Sequence similarity of 99% to AF44402.1, <i>Udeniomyces pyricola</i> , 98% to AY841862, <i>U. pseudopyricola</i> , and up to 85% similarity to a range of other <i>Udeniomyces</i> species. |
| Tremellales;                    |                                              |                       |                       |                       |                          |                                                                                                                                                                                             |
| Tremellaceae                    | <i>Cryptococcus</i> aff. <i>amylolyticus</i> | 1                     | 0                     | 0                     | KM216348                 | Sequence similarity of 97% to several accessions of <i>Cryptococcus</i> aff. <i>amylolyticus</i> , including EF363150.1                                                                     |
|                                 | <i>Cryptococcus</i> sp. 1                    | 1                     | 0                     | 0                     | KM216340                 | Sequence similarity of up to 99.6% to several accessions of <i>Cryptococcus wieringaes</i> , including FN824493.1 and up to 96% to several other <i>Cryptococcus</i> species.               |
|                                 | <i>Cryptococcus</i> sp. 2                    | 1                     | 0                     | 0                     | KM216339                 | Sequence similarity of up to 87% to several species of <i>Cryptococcus</i> , including JN942258.1, <i>C. aerius</i> ,                                                                       |
|                                 | <i>Cryptococcus victoriae</i>                | 2                     | 1                     | 0                     | KM216343                 | Sequence similarity of up to 99.8% to many accessions of <i>Cryptococcus victoriae</i> , including HQ615694.1                                                                               |
|                                 | <i>Tremella</i> sp.                          | 2                     | 2                     | 0                     | KM216338                 | Sequence similarity of 99% to DQ242633.1, <i>Tremella</i> sp., and up to 83% similarity to a range                                                                                          |

| Class;<br>Order; Family                      | OTU                                      | N5 <sup>1</sup> | N8 <sup>1</sup> | CL <sup>3</sup> | GenBank Accession | Criterion for identification                                                                                                                                              |
|----------------------------------------------|------------------------------------------|-----------------|-----------------|-----------------|-------------------|---------------------------------------------------------------------------------------------------------------------------------------------------------------------------|
|                                              | Tremellaceae sp. 1                       | 1               | 0               | 0               | KM624601          | of identified <i>Tremella</i> species.<br>Sequence similarity of up to 94% to a range of Tremellaceae, including <i>Cryptococcus fagi</i> and <i>Tremella neofoliacea</i> |
|                                              | Tremellaceae sp. 2*                      | 1               | 0               | 0               | KM624602          | Up to 90% sequence similarity to a range of Tremellaceae species, including AF444404, <i>Fellomyces horovitziae</i> .                                                     |
| Trichosporonaceae                            | <i>Trichosporon</i> aff. <i>dulcitum</i> | 0               | 1               | 0               | KM216365          | Sequence similarity of 99% to Af444428.1, <i>Trichosporon dulcitum</i> , and 98% to several other <i>Trichosporon</i> species.                                            |
| Basidiomycota;<br>Order and family<br>undet. | Basidiomycota sp. 1                      | 1               | 0               | 0               | KM624603          | Up to 92% sequence similarity to several species of <i>Rhodotorula</i> and <i>Sporobolomyces</i> , including FN424107.1, <i>R. aff. diffluens</i> .                       |
|                                              | Basidiomycota sp. 2                      | 2               | 0               | 0               | KM624606          | High sequence similarity in the 5.8S region only to a range of basidiomycete species including JN620354, <i>Bensingtonia</i> sp.                                          |
|                                              | Basidiomycota sp. 5                      | 0               | 0               | 1               | KM624590          | Up to 92% sequence similarity to several uncultured fungal clones, and 86% to a range of basidiomycete species, including JF908470.1, <i>Mycena senesii</i> .             |
|                                              | Basidiomycota sp. 7                      | 2               | 0               | 1               | KM624589          | Sequence similarity of up to 86% to a range of basidiomycete species, including <i>Armillaria novae-zelandiae</i>                                                         |

<sup>1</sup>N5 represents the frequency of occurrence in 34 bulk needle samples from 12 x 5y.o. plantations

<sup>2</sup>N8 represents the frequency of occurrence in 36 bulk needle samples from a single 8 y.o. plantation.

<sup>3</sup>CL represents the number of isolates (out of the 286 that were sequenced).
